# Supplementary material
Source: PubMed Central journal article supplement (PMC5577932)

**Liver B**

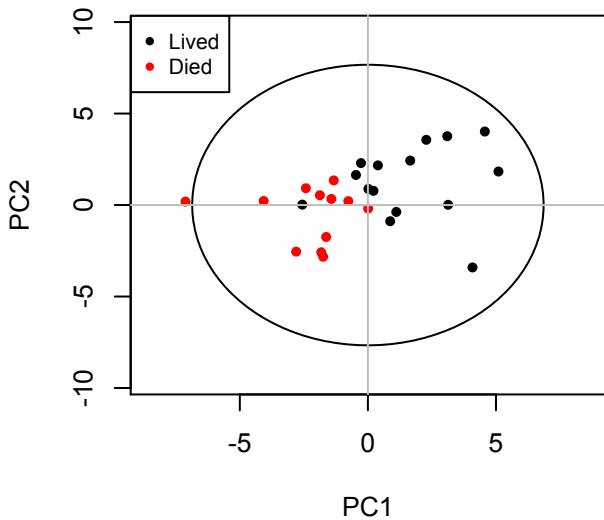

**Muscle B**

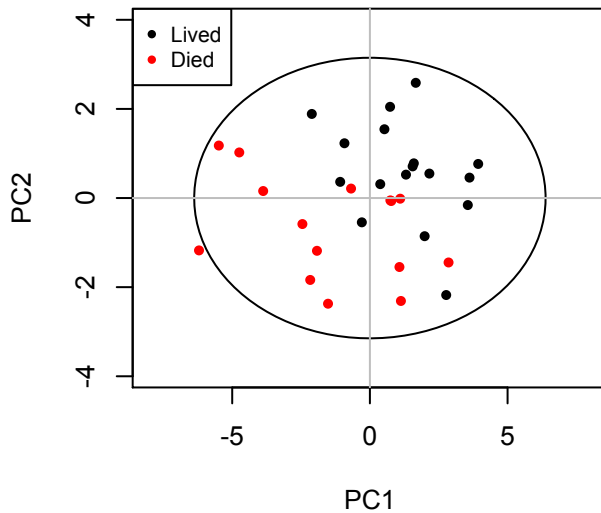

**Serum B**

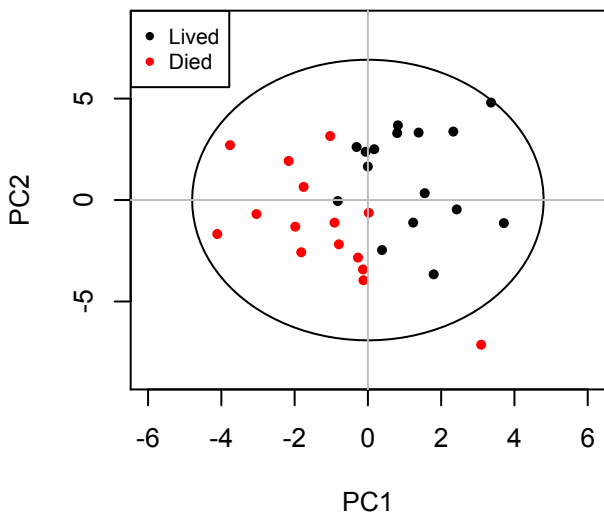

**Urine B**

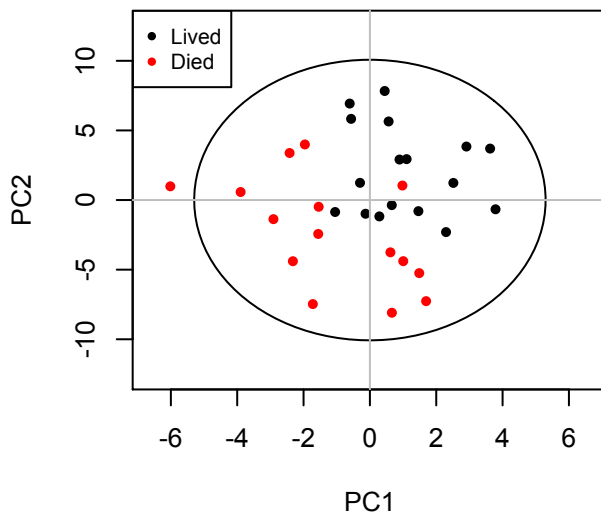

Supplement: NIHMS884123-supplement-ESI1.pdf [file NIHMS884123-supplement-ESI1.pdf]

**Liver FR2-S45**

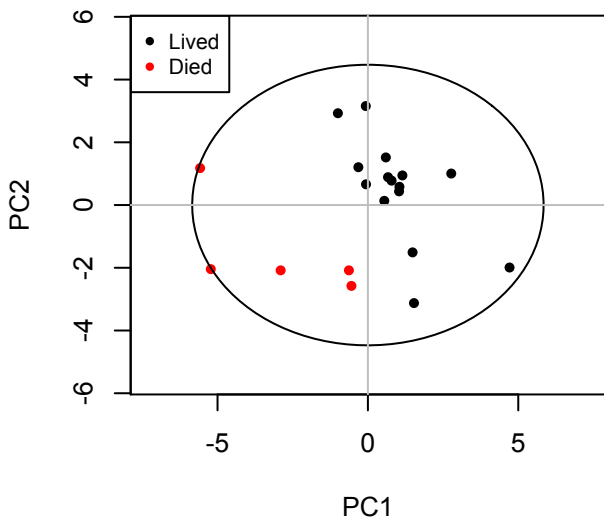

**Muscle FR2-S45**

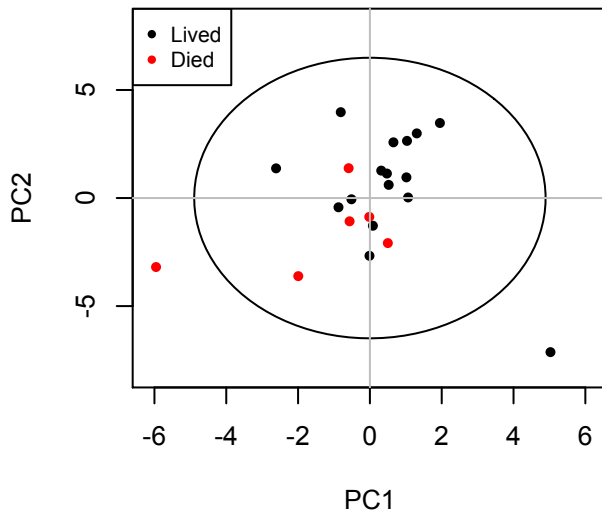

**Serum FR2-S45**

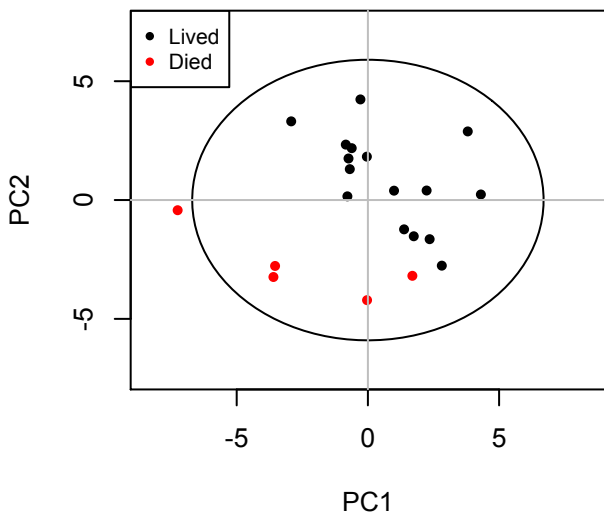

**Urine FR2**

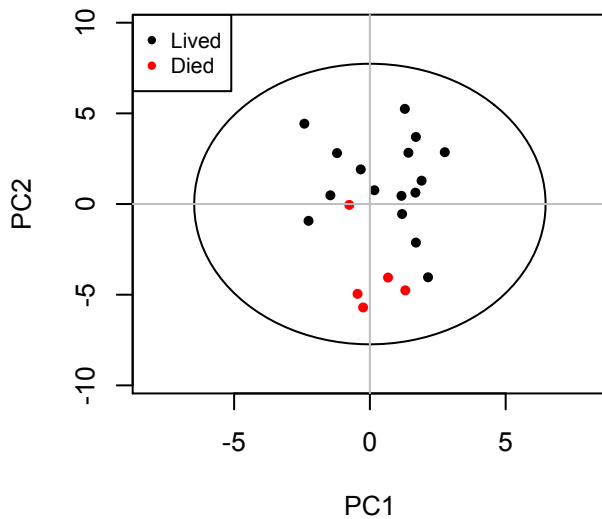

Supplement: NIHMS884123-supplement-ESI2.pdf [file NIHMS884123-supplement-ESI2.pdf]
